# Supplementary material for: Long-read based assembly and synteny analysis of a reference Drosophila subobscura genome reveals signatures of structural evolution driven by inversions recombination-suppression effects
Source: BMC Genomics. 2019 Mar 18;20:223. doi: 10.1186/s12864-019-5590-8 (PMC6423853; doi:10.1186/s12864-019-5590-8)
Supplement: Supplementary file 21 — Table S10. Synteny analysis of inversion breakpoints. Provided is breakpoint information for 12 inversions, including six from pseudochromosome A (h1, h2, h3, h4, 5 and 6), one from J (ST), two from U (1 and 2), two from E (g1 and ST), and one from O (ms). The MS Excel file contains six spreadsheets, including one for this title, and one for each of the five major pseudochromosomes (i.e., A, J, U, E and O). For each pseudochromosome, inversions are listed in column “A”. For each inversion, information about the three protein coding genes flanking each side of each breakpoint in three species, including D. melanogaster, D. guanche and D. subobscura is provided in subsequent columns, from “B” to “Q”. This information includes species names, names and pseudochromosome coordinates of the three coding gene markers on both sides of each distal and proximal breakpoint, and the size of the pseudochromosome segment spanned by the breakpoints in Mb. Also provided is, for each breakpoint, its cytological and estimated pseudochromosome coordinates, and its hypothetical originating mechanism with the length of the associated duplication where it applies. Cells color background indicate contiguity (brown) or altered (yellow) order of the markers relative to the outgroup (D. melanogaster/D. pseudoobscura). For example, in the case of hypothetical inversion 1 of the A chromosome (i.e., h1) in D. subobscura, the three markers downstream the proximal breakpoint and upstream the distal breakpoint are in reverse order relative to D. guanche, which shows the markers ordered as in D. melanogaster. Reciprocal BLASTn searches with each breakpoint did not detect evidence of duplication, suggesting that the most likely originating mechanism of inversion Ah1 (depicted in yellow) is simple, or nearly straight breaks. (XLSX 31 kb) [file 12864_2019_5590_MOESM21_ESM.xlsx]

## Sheet: Table S10 Title
	Table S10. Synteny analysis of inversion breakpoints. Provided is breakpoint information for 12 inversions, including six from pseudochromosome A (h1, h2, h3, h4, 5 and 6), one from J (ST), two from U (1 and 2), two from E (g1 and ST), and one from O (ms). The MS Excel file contains six spreadsheets, including one for this title, one for each of the five major pseudochromosomes (i.e., A, J, U, E …

## Sheet: ChrA
Inversion					Proximal BP				Size in Mb				Distal BP
h1	Dmel	CG8958	CG42354	CG42353		Met	RPA3	CG1703	...	rst	kirre	CG4116		Notch	CG18508	Fcp3C
		16,083,232..16,085,751	16,093,059..16,104,946	16,093,059..16,104,946		11,616,124..11,621,280	11,615,097..11,615,840	11,611,927..11,615,12		2,950,399..2,973,834	2,740,384..3,134,532	3,066,615..3,067,562		3,134,870..3,172,221	3,172,268..3,173,140	3,173,376..3,174,474
	Dgua	Dgua6C020561	Dgua6C020556	Dgua6C020555		Dgua6C020554	Dgua6C020553	Dgua6C020552	...	Dgua6C018756	Dgua6C018763	Dgua6C018760		Dgua6C018764	Dgua6C018765	Dgua6C018766
		4,394,892..4,395,406	4,407,304..4,405,878	4,412,436..4,408,939		4,433,803..4,431,450	4,437,876..4,437,635	4,435,586..4,438,072		11,003,381..11,001,071	11,219,458..11,222,700	11,143,264..11,142,494		11,255,651..11,261,829	11,266,066..11,265,701	11,267,552..11,266,920
	Dsub	dsub_00011828-RA	dsub_00011829-RA	dsub_00011830-RA	2D	dsub_00011912-RA	dsub_00011910-RA	dsub_00011911-RA	6.9	dsub_00011843-RA	dsub_00011831-RA	dsub_00011837-RA	4D	dsub_00011913-RA	dsub_00011914-RA	dsub_00011915-RA
		2,326,053..2,326,579	2,338,251..2,337,491	2,344,104..2,340,575	2,358,139..2,368,259	5,004,317..5,002,922	5,009,361..5,009,120	5,007,086..5,008,701		2,635,841..2,637,213	2,367,858..2,366,864	2,455,338..2,456,114	4,998,698..4,999,821	4,965,846..4,962,125	4,957,892..4,958,266	4,956,426..4,957,052
					simple break								simple break
h2	Dmel	CG14230	meso18E	CG12531		AP-1-2β	CG14234	CG32679	...	CG11294	Hexo2	CG2004		CG1785	l(1)G0020	CG1789
		19,704,176..19,706,417	19,706,418..19,713,045	19,718,923..19,730,199		19,731,004..19,734,581	19,735,570..19,740,456	10,366,402..10,367,472		8,691,820..8,693,620	8,709,652..8,712,478	8,712,472..8,714,924		8,714,936..8,717,065	8,716,713..8,720,277	8,720,520..8,721,503
	Dgua	Dgua6C008958	Dgua6C008956	Dgua6C008949		Dgua6C008948	Dgua6C008946	Dgua6C008945	...	Dgua6C018850	Dgua6C018851	Dgua6C018852		Dgua6C018853	Dgua6C018854	Dgua6C018855
		9,173,378..9,170,722	9,172,022..9,175,228	9,155,476..9,153,808		9,148,238..9,146,345	9,143,832..9,141,363	9,138,312..9,138,921		11,579,904..11,579,123	11,595,796..11,597,336	11,598,878..11,598,070		11,601,200..11,601,932	11,605,024..11,603,739	11,606,084..11,606,739
	Dsub	dsub_00011977-RA	dsub_00011976-RA	dsub_00011975-RA	4B	Dsub_00013126-RA	Dsub_00013127-RA	dsub_00013128-RA	5.2	dsub_00011972-RA	dsub_00011973-RA	dsub_00011974-RA	9B	dsub_00013125-RA	Dsub_00013124-RA	Dsub_00013123-RA
		4,579,042..4,580,161	4,582,904..4,581,838	4,596,640..4,597,239	4,603,073..4,610,502	10,974,749..10,973,772	10,969,870..10,969,505	10,962,968..10,963,327		4,625,151..4,625,751	4,608,614..4,607,304	4,604,973..4,605,439	10,975,378	10,975,995..10,976,727	10,979,837..10,978,552	10,981,113..10,981,587
					simple break								simple break
h3	Dmel	CG4119	Sirt4	CG13865		zyd	CG17167	CG17163	...	MSBP	MVD	ND-20		Rhp	mmd	Paf-AHα
		5,666,052..5,670,652	5,664,628..5,665,940	23,013,495..23,016,586		23,022,898..23,035,550	23,068,301..23,081,144	3,080,759..23,082,709		15,887,567..15,890,109	15,749,166..15,751,737	15,985,473..15,986,808		15,788,897..15,793,632	15,946,936..15,973,159	15,784,009..15,785,583
	Dgua	Dgua6C020353	Dgua6C020354	Dgua6C020355		Dgua6C020357	Dgua6C020358	Dgua6C020359	...	Dgua6C008677	Dgua6C008678	Dgua6C008679		Dgua6C008683	Dgua6C008684	Dgua6C008685
		1,352,114..1,349,276	1,356,492..1,357,869	1,361,757..1,363,403		1,380,523..1,381,006	1,420,321..1,420,661	1,424,170..1,423,884		7,387,947..7,388,729	7,391,174..7,393,575	7,397,279..7,396,469		7,407,431..7,409,494	7,414,030..7,413,244	7,441,889..7,441,494
	Dsub	dsub_00013103-RA	dsub_00013104	dsub_00013105	7A	dsub_00012390-RA	dsub_00012391-RA	dsub_00012392-RA	8.6	dsub_00012483-RA	dsub_00012482-RA	Dsub_00012482-RA	8B	dsub_00012389-RA	dsub_00012388-RA	Dsub_00012387-RA
		7,972,777..7,973,910	7,971,225..7,970,462	7,967,992..7,967,598	7,964,579..7,966,743	9,143,147..9,142,646	9,120,846..9,120,504	9,117,994..9,118,280		7,953,914..7,954,263	7,958,025..7,958,956	7,960,385..7,959,732	9,154,127..9,157,256	9,163,713..9,164,358	9,172,253..9,171,467	9,200,399..9,200,001
					simple break								simple break
h4	Dmel	CG2076	CG2081	CG18085		CG15203	CG1537	CG1545	...	CG32677	CG43347	CG1628		CG15302	CG32683	CG2096
		11,090,210..11,092,098	11,089,290..11,090,219	11,071,441..11,086,299		11,066,552..11,068,379	11,062,027..11,063,170	11,057,545..11,059,619		10,627,737-10,710,947	10,602,641-10,620,190	10,598,146-10,602,714		10,458,186..10,459,676	10,410,391..10,454,895	10,385,960..10,409,817
	Dgua	Dgua6C020833	Dgua6C020835	Dgua6C021379		Dgua6C020540	Dgua6C020543	Dgua6C020537	...	Dgua6C020001	Dgua6E020006	Dgua6E020007		Dgua6E020032	Dgua6C020037	Dgua6C020039
		706,913..707,368	724,308..723,138	766,249..766,697		841,389..839,497	860,472..861,191	864,972..865,531		2,902,204-2,903,892	2,788,204-2,810,302	2,783,772-2,788,163		2,598,054..2,599,344	2,526,431..2,524,129	2,467,220..2,467,905
	Dsub	dsub_00013163-RA	dsub_00013162-RA	dsub_00013160-RA	1B/C	dsub_00013076-RA	dsub_00013077-RA	dsub_00013078-RA	7.5	dsub_00013277-RA	dsub_00013222-RA	dsub_00013221-RA	7B/C	dsub_00013331-RA	dsub_00013074-RA	dsub_00012310-RA
		583,065..582,777	683,751..683,930	687,951..692,605	692,605..692,845	8,198,726..8,198,889	8,187,281..8,187,118	8,181,258..8,181,044		804,507-806,344	695,794-718,013	692,845-695,613	8,198,726..8,204,354	8,296,147..8,297,211	8,257,263..8,258,327	8,311,509..8,311,124
					simple break								simple break
5	Dmel	CG4653	CG9673	Psf3		Ant2	CG15211	BTBD9	...	CG4928	CG13002	CG4880		Rcp	DENR	Nprl2
		16,704,081..16,705,278	16,702,786..16,703,884	10,383,353..10,385,861		10,778,954..10,786,907	10,772,541..10,778,981	10,768,537..10,772,154		16,913,180..16,938,209	16,889,810..16,890,637	16,886,818..16,888,729		16,884,581..16,886,612	16,885,546..16,886,560	16,882,509..16,884,365
	Dpse	GA18331	GA21955	GA15311		GA14170	GA13573	GA14860	...	GA18532	GA11968	GA18498		GA18494	GA21541	GA21545
		XL_group1a:6,748,459..6,749,335	XL_group1a:6,749,566..6,750,541	XL_group1a:6,882,770..6,883,855		XL_group1e:6,008,849..6,010,587	XL_group1e:6,002,484..6,008,414	XL_group1e:5,997,848..6,001,444		XL_group3b:238,767..261,895	XL_group3b:288,226..289,299	XL_group3b:297,918..299,213		XL_group3b:299,739..300,604	XL_group3b:300,526..301,442	XL_group3b:301,513..303,059
	Dgua	Dgua6C019547	Dgua6C019545	Dgua6C019543		Dgua6C019541	Dgua6C019539	Dgua6C019538	...	Dgua6C010712	Dgua6C010715	Dgua6C010716		Dgua6C010717	Dgua6C010718	Dgua6C010719
		13,414,353..13,415,177	13,417,298..13,418,139	13,423,009..13,424,215		13,429,599..13,430,678	13,432,665..13,439,709	13,440,311..13,443,923		16,683,171..16,707,814	16,724,268..16,725,519	16,726,436..16,728,541		16,729,676..16,730,364	16,730,477..16,731,181	16,731,413..16,732,710
	Dsub	dsub_00003764-RA	dsub_00003763-RA	dsub_00003762-RA	10C	dsub_00003371-RA	dsub_00003372-RA	dsub_00003373-RA	3.5	dsub_00003758-RA	dsub_00003760-RA	dsub_00003761-RA	13A/13B	dsub_00003369-RA	dsub_00003368-RA	dsub_00003367-RA
		12,894,875..12,894,333	12,900,258..12,900,789	12,904,794..12,904,399	12,905,115	16,353,113..16,352,638	16,351,494..16,351,692	16,342,500..16,343,139		12,947,149..12,948,003	12,908,152..12,908,518	12,905,428..12,906,474	16,360,849	16,365,803..16,366,024	16,366,658..16,366,395	16,367,811..16,368,367
					simple break								simple break
6	Dmel	CG9095	CG43737	CG9101		CG5877	gce	CG8173	...	CG2750	CG11356	Muc11A			DENR	Nprl2
		15,139,937..15,163,225	15,175,441..15,189,931	15,228,744..15,229,875		15,293,031..15,297,169	15,297,766..15,319,074	17,707,401..17,709,653		12,107,200..12,113,357	12,102,944..12,103,840	12,059,795..12,065,144			16,885,546..16,886,560	16,882,509..16,884,365
	Dgua	Dgua6C011397	Dgua6C011399	Dgua6C011402		Dgua6C011403	Dgua6C011404	Dgua6C011405	...	Dgua6C011661	Dgua6C011662	Dgua6C011664		Telomere	Dgua6C010718	Dgua6C010719
		21,242,441..21,265,863	21,274,378..21,288,021	21,316,160..21,316,883		21,363,178..21,366,233	21,376,195..21,383,644	21,384,972..21,388,927		22,858,874..22,860,058	22,862,198..22,863,032	22,881,600..22,891,075		-	16,730,477..16,731,181	16,731,413..16,732,710
	Dsub	dsub_00002950-RA	dsub_00002949-RA	dsub_00002947-RA	16A	dsub_00002771-RA	dsub_00002772-RA	dsub_00002773-RA	1.6	dsub_00002943-RA	dsub_00002944-RA	dsub_00002946-RA	Telomere	Telomere	dsub_00003368-RA	dsub_00003367-RA
		21,057,078..21,056,259	21,084,365..21,085,935	21,124,412..21,124,178	21,175,026	22,825,288..22,823,087	22,806,195..22,805,374	22,802,713..22,802,276		21,220,297..21,228,325	21,216,357..21,215,714	21,181,302..21,180,652	22,820,779	-	16,366,658..16,366,395	16,367,811..16,368,367
					simple break								simple break

## Sheet: ChrJ
Inversion					Proximal BP				Size in Mb				Distal BP
ST	Dmel	CG42831	tna	CG6418		Blos4	CG6409	galla-2	...	msd5	l(3)02640	CG2199		Atg18a	Err	Uxs
		10,814,819..10,816,084	10,857,889..10,876,496	10,876,315..10,879,037		10,879,085..10,880,188	10,880,699..10,882,386	10,882,890..10,883,573		1,332,307..1,333,146	1,334,889..1,339,415	1,339,460..1,342,403		8,186,857..8,191,118	8,183,361..8,186,671	8,180,923..8,183,369
	Dgua	Dgua6C014849	Dgua6C014850	Dgua6C014851		Dgua6C014852	Dgua6C014853	Dgua6C014854	...	Dgua6C009624	Dgua6C009623	Dgua6C009622		Dgua6C009621	Dgua6C009620	Dgua6C009615
		15,496,992..15,497,222	15,520,279..15,53,6581	15,539,095..15,541,548		15,541,751..15,542,316	15,542,505..15,543,909	15,545,193..15,545,730		21,247,128..21,248,235	21,253,287..21,255,627	21,248,603..21,255,718		21,256,813..21,258,768	21,257,848..21,263,289	21,262,648..21,264,296
	Dsub	dsub_00001172-RA	dsub_00001174-RA	dsub_00001175-RA	30A	dsub_00009414-RA	dsub_00009415-RA	dsub_00009416-RA	6	dsub_00001178-RA	dsub_00001177-RA	dsub_00001176-RA	34E	dsub_00009413-RA	dsub_00009412-RA	dsub_00009411-RA
		15,682,384..15,682,527	15,740,895..15,741,769	15,748,751..15,746,735	15,748,871	21,728,955..21,728,592	21,726,629..21,728,395	21,725,028..21,724,678		15,757,535..15,758,306	15,754,221..15,752,716	15,749,401..15,751,803	21,729,277	21,732,198..21,731,437	21,734,856..21,735,715	21,737,853..21,736,998
					simple break?								simple break?

## Sheet: ChrU
Inversion					Proximal BP				Size in Mb				Distal BP
1	Dmel	Edem2	Tsp	AkhR		Aatf	Homer	Liprin-α	...	CG7309	dpr2	CG14072		CG33129		abo
		13,192,201-13,197,281	6,686,791-6,709,086	6,711,286-6,716,186		6,717,625-6,719,389	6,719,394-6,723,359	6,723,903-6,732,766		10,906,270-10,908,893	10,917,015-10,964,153	10,936,662-10,937,931		10,964,905-10,970,275	10,972,280-10,973,408	10,973,443-10,975,293
	Dgua	Dgua6C004248	Dgua6C004241	Dgua6C004240		Dgua6C004230	Dgua6C004227	Dgua6C004226	...	Dgua6C013455	Dgua6C013454	-		Dgua6C013450	-	Dgua6C013449
		6,361,671-6,371,886	6,382,542-6,399,238	6,409,890-6,416,998		6,419,332-6,421,330	6,423,372-6,425,380	6,422,864-6,423,265		13,820,960-13,822,925	13,828,561-13,833,518	-		13,844,290-13,849,848	-	13,852,468-13,855,210
	Dsub	dsub_00004051-RA	dsub_00004053-RA	dsub_00004054-RA	39D/40A	dsub_00004896-RA	dsub_00004895-RA	dsub_00004894-RA	7.8	dsub_00004057-RA	dsub_00004055-RA	dsub_00004056-RA	45E/46A	dsub_00004897-RA	dsub_00004898-RA	dsub_00004899-RA
		6,550,460-6,549,639	6,565,309-6,563,826	6,594,248-6,593,754	6,605,472	14,401,669-14,400,983	14,396,806-14,397,263	14,391,855-14,390,933		6,624,152-6,624,843	6,617,019-6,617,310	6,612,617-6,612,422	14,401,875	14,407,868-14,407,254	14,410,061-14,410,573	14,412,650-14,411,673
					staggered break with a 689 bp-long duplication								staggered break with a 689 bp-long duplication
2	Dmel	SCAR	Piwi	LmanI		LmanI	LmanII	RluA-1	...	tho2	CC25	TBCD		CC25	TBCD	AIF
		10,976,772-10,982,395	10,982,205-10,987,42	10,452,677-10,457,241		10,452,677-10,457,241	10,457,658-10,462,472	10,463,340-10,474,349		2,137,350-2,145,187	2,145,297-2,147,275	2,147,518-2,151,664		2,145,297-2,147,275	2,147,518-2,151,664	2L:2,151,754-2,155,389
	Dgua	Dgua6C013448	Dgua6C013445	Dgua6C013444		Dgua6C013444	Dgua6C013443	Dgua6C013439	...	Dgua6C012132	Dgua6C012130	Dgua6C012129		Dgua6C012130	Dgua6C012129	Dgua6C012128
		13,855,979-13,861,735	13,862,465-13,867,333	13,868,838-13,872,214		13,868,838-13,872,214	13,873,999-13,882,183	13,880,654-13,890,588		21,237,792-21,246,393	21,248,066-21,251,063	21,250,114-21,253,934		21,248,066-21,251,063	21,250,114-21,253,934	21,254,920-21,281,627
	Dsub	dsub_00004900-RA	dsub_00004901-RA	dsub_00004902-RA	45E/46A	dsub_00001957-RA	dsub_00001958-RA	dsub_00001959-RA	7.7	dsub_00004905-RA	dsub_00004904-RA	dsub_00004903-RA	51C/51D	dsub_00001956-RA	dsub_00001955-RA	dsub_00001954-RA
		14,415,590-14,416,334	14,421,981-14,421,104	14,428,615-14,427,415	14,432,882	22,136,471-22,136,721	22,132,508-22,131,859	22,119,621-22,120,374		14,442,241-14,443,396	14,437,413-14,438,423	14,435,531-14,434,751	22,135,579	22,140,101-22,139,103	22,141,788-22,142,932	22,146,489-22,147,305
					staggered break with a 1,007 bp-long duplication								staggered break with a 1,007 bp-long duplication

## Sheet: ChrE
Inversion					Proximal BP				Size in Mb				Distal BP
g1	Dmel	Pdk	DUBAI	CG30051		CG8818	CG13151	achi	...	nito	CG2915	CG2906		CG7639	pcs	CG1698
		9,426,439..9,434,638	12,431,447..12,436,577	12,436,120..12,436,990		12,517,264..12,518,912	12,515,375..12,517,284	12,511,534..12,515,062		7,962,463..7,969,805	7,958,207..7,960,015	7,956,150..7,958,254		14,987,660..14,992,230	14,981,263..14,991,336	9,793,326..9,798,006
	Dpse								...	GA15511	GA15515	GA15509		GA20499	GA20569	GA14253
										5,481,745..5,485,609	5,478,275..5,479,958	5,476,212..5,478,321		5,463,925..5,468,367	5,464,560..5,475,743	14,306,944..14,311,514
	Dgua	Dgua6C002949	Dgua6C002947	Dgua6C002942	59D	Dgua6C001620	Dgua6C001621	Dgua6C001622	5.9	Dgua6C002937	Dgua6C002940	Dgua6C002941	66C/D	Dgua6C001616	Dgua6C001619	Dgua6C001615
		5,814,425..5,825,426	5,825,774..5,830,930	5,831,255..5,831,931	6,170,075	11,425,155..11,426,574	11,423,190..11,424,989	11,420,338..11,422,337		5,838,190..5,847,201	5,832,539..5,836,039	5,832,768..5,834,406	12,059,603	11,434,480..11,439,463	11,436,826..11,439,157	11,451,839..11,456,281
					simple break								simple break
	Dsub	dsub_00006525-RA	dsub_00006524-RA	dsub_00006523-RA		dsub_00006522-RA	dsub_00006521-RA	dsub_00006520-RA	...	dsub_00008465-RA	dsub_00008464-RA	dsub_00008463-RA		dsub_00008462-RA	dsub_00008461-RA	dsub_00008460-RA
		6,158,460..6,157,885	6,168,765..6,167,894	6,170,985..6,171,134		6,172,563..6,173,543	6,175,952..6,174,153	6,176,810..6,177,460		12,052,746..12,050,911	12,054,759..12,055,802	12,059,189..12,058,372		12,068,945..12,068,387	12,070,185..12,071,318	12,085,998..12,085,352
ST	Dmel	PAN2	IMPPP	CG18278		CG42321	CG30065	Ser8	...	Tsp42Ei	Tsp42Ef	Tsp42Ee		Tsp42Ed	Tsp42Eb	Tsp42Ea
		8,928,169..8,933,103	13,407,011..13,408,358	13,408,042..13,409,887		13,414,978..13,439,051	13,433,028..13,433,760	13,434,207..13,435,045		7,035,125..7,036,949	7,025,010..7,028,082	7,012,254..7,018,362		7,009,498..7,011,739	6,998,848..6,999,848	6,992,676..7,004,259
	Dgua	Dgua6C001433	Dgua6C001432	Dgua6C001431		Dgua6C001427	-	Dgua6C001429	...	Dgua6C000495	Dgua6C000491	Dgua6C000489		Dgua6C000488	Dgua6C000486	Dgua6C000485
		12,478,678..12,483,457	12,483,962..12,484,938	12,485,225..12,486,905		12,487,960..12,509,470	-	12,505,599..12,506,431		16,937,135..16,938,479	16,944,184..16,947,318	16,951,164..16,957,418		16,957,980..16,959,599	16,962,929..16,963,734	16,964,785..16,967,239
	Dsub	dsub_00008344-RA	dsub_00008343-RA	dsub_00008342-RA	67C	dsub_00007300-RA	dsub_00007301-RA	dsub_00007302-RA		dsub_00008339-RA	dsub_00008340-RA	dsub_00008341-RA	72B/C	dsub_00007299-RA	dsub_00007298-RA	dsub_00007297-RA
		13,134,430..13,135,588	13,139,409..13,140,012	13,141,999..13,141,302	13,147,467	18,141,387..18,142,760	18,131,397..18,131,188	18,130,271..18,129,492	5	13,163,787..13,164,151	13,156,079..13,156,277	13,147,955..13,148,321	18,149,721	18,153,549..18,153,123	18,155,764..18,155,510	18,158,213..18,157,974
					staggered break with a 513 bp-long duplication								staggered break with a 513 bp-long duplication

## Sheet: ChrO
Inversion					Proximal BP				Size in Mb				Distal BP
ms	Dmel	crb	CG5715	Uck		Hex-t2	tx	CG6503	...	Mdg4	CG16791	CG16791		SIFaR	CG3301	CG3308
		24,295,078-24,314,541	24,293,366-24,294,399	24,290,172-24,293,371		26,450,671-26,452,327	26,440,778-26,448,991	26,424,698..26,425,105		21,350,846-21,377,401	21,318,300-21,349,601	21,318,300-21,349,601		21,276,664-21,293,998	21,274,243-21,276,249	21,271,078-21,273,817
	Dpse	GA19553	GA19079	GA19542		GA26424	GA18883	GA27339	...	GA30094	GA14153	GA14153		GA10579	GA17238	GA17263
		18,691,182-18,715,006	18,719,122-18,720,109	18,719,936-18,723,593		18,729,381-18,730,976	18,733,620-18,743,197	18,761,851..18,762,274		5,677,657-5,703,410	5,645,688-5,675,116	5,645,688-5,675,116		5,601,871-5,617,141	5,599,805-5,600,900	5,597,677-5,599,611
	Dgua	Dgua6C018136	Dgua6C018133	Dgua6C018132		Dgua6C018127	Dgua6C018126	Dgua6E018124	...	Dgua6C016051	Dgua6C016054	Dgua6C016054		Dgua6C016055	Dgua6C016057	Dgua6C016058
		12,297,196-12,315,643	12,320,461-12,320,775	12,320,902-12,323,836		12,331,659-12,333,226	12,333,687-12,335,910	12,361,761-12,362,463		20,723,653-20,724,394	20,725,752-20,758,268	20,725,752-20,758,268		20,784,926-20,796,772	20,799,670-20,800,420	20,800,861-20,802,231
	Dsub	dsub_00007858-RA	dsub_00007860-RA	dsub_00007861-RA	84D/85A	dsub_00010631-RA	dsub_00010632-RA	dsub_00010633-RA	8.8	dsub_00007864-RA	dsub_00007863-RA	dsub_00007862-RA	93D/94A	dsub_00010627-RA	dsub_00010626-RA	dsub_00010625-RA
		12,425,845-12,423,909	12,445,693-12,446,524	12,449,581-12,449,207	12,449,835	21,199,200-21,200,523	21,196,963-21,198,246	21,169,502-21,169,271		12,505,128-12,504,673	12,493,190-12,492,791	12,473,599-12,473,148	21,207,627	21,222,780-21,223,524	21,226,423-21,226,770	21,228,165-21,228,517
					staggered break with a 538 bp-long duplication								staggered break with a 538 bp-long duplication
